# Supplementary material for: Associations between Nutritional and Immune Status and Clinicopathologic Factors in Patients with Pancreatic Cancer: A Comprehensive Analysis
Source: MDPI journal article supplement (doi:10.3390/cancers13205041), 2021-10-09
Supplement: s1 [file s1]

**Table S1.** The patient general clinical characteristics.

| Feature                                    | Value                       |
|--------------------------------------------|-----------------------------|
| Demographic characteristics                |                             |
| Age (years)                                | 65.44 ± 8.37 (41-86)        |
| ≤ 65 years                                 | 39 (49.75 %)                |
| > 65 years                                 | 41 (51.25 %)                |
| Male/Female                                | 40 (50.00 %) / 40 (50.00 %) |
| Weight loss %                              |                             |
| Stable                                     | 49 (61.25 %)                |
| Weight loss ≤ 10%                          | 12 (15.00 %)                |
| Weight loss > 10%                          | 19 (23.75 %)                |
| Weight [kg]                                | 70.92 ± 12.92 (40.00-99.00) |
| Weight loss [kg]                           | 7.77 ± 8.33 (0.00-30.00)    |
| BMI (kg/m <sup>2</sup> )                   | 25.04 ± 3.51 (16.64-34.25)  |
| BMI groups according to WHO classification |                             |
| < 18.5                                     | 3 (3.75 %)                  |
| 18.5-24.9                                  | 33 (41.25 %)                |
| 25-29.9                                    | 39 (48.75 %)                |
| ≥ 30                                       | 5 (6.25 %)                  |
| BMI general division                       |                             |
| < 18.5                                     | 3 (3.75 %)                  |
| > 18.5                                     | 77 (96.25 %)                |
| NRS 2002 (points)                          | 2.14 ± 1.11 (1-5)           |
| NRS 2002 classification                    |                             |
| 0                                          | 0 (0.00 %)                  |
| 1                                          | 25 (31.25 %)                |
| 2                                          | 34 (42.50 %)                |
| 3                                          | 10 (12.50 %)                |
| 4                                          | 7 (8.75 %)                  |
| 5                                          | 4 (5.00 %)                  |
| NRS 2002 groups                            |                             |
| < 3 points                                 | 59 (73.75 %)                |
| ≥ 3 points                                 | 21 (26.25 %)                |
| Arterial hypertension                      |                             |
| No                                         | 40 (50.00 %)                |
| Yes                                        | 40 (50.00 %)                |
| Ischemic heart disease                     |                             |
| No                                         | 75 (93.75 %)                |
| Yes                                        | 5 (6.25 %)                  |
| Arterial fibrillation                      |                             |
| No                                         | 76 (95.00 %)                |
| Yes                                        | 4 (5.00 %)                  |
| Other heart arrhythmia                     |                             |
| No                                         | 73 (91.25 %)                |
| Yes                                        | 7 (8.75 %)                  |
| Diabetes mellitus (type 1)                 |                             |
| No                                         | 77 (96.25 %)                |
| Yes                                        | 3 (3.75 %)                  |
| Diabetes mellitus (type 2)                 |                             |

|                                                          |                          |
|----------------------------------------------------------|--------------------------|
| No                                                       | 55 (68.75 %)             |
| Yes                                                      | 25 (31.25 %)             |
| Pulmonary obturative disease /asthma                     |                          |
| No                                                       | 72 (90.00 %)             |
| Yes                                                      | 8 (10.00 %)              |
| Smoking                                                  |                          |
| No                                                       | 48 (60.00 %)             |
| Yes                                                      | 32 (40.00 %)             |
| Smoking cessation                                        |                          |
| No                                                       | 14 (17.50 %)             |
| Yes                                                      | 18 (22.50 %)             |
| Not applicable                                           | 48 (60.00 %)             |
| Duration of smoking (years)                              | 5 ± 12.18 (5-53)         |
| Number of cigarettes per day                             | 18.85 ± 3.45 (10-20)     |
| Alcohol consumption                                      |                          |
| No                                                       | 72 (90.00 %)             |
| Yes                                                      | 8 (10.00 %)              |
| Preoperative biliary stenting                            |                          |
| No                                                       | 33 (41.25 %)             |
| Yes                                                      | 47 (58.75 %)             |
| Duration between biliary stenting and operation [months] | 3.44 ± 3.57 (0.50-18.00) |
| Previous other operations                                |                          |
| No                                                       | 53 (66.25 %)             |
| Yes                                                      | 27 (33.75 %)             |
| Clinical manifestation                                   |                          |
| Jaundice                                                 | 42 (52.50 %)             |
| Abdominal pain                                           | 37 (46.25 %)             |
| Diarrhea                                                 | 13 (16.25 %)             |
| Nausea                                                   | 9 (11.25 %)              |
| Vomitus                                                  | 6 (7.50 %)               |
| Acute pancreatitis                                       | 5 (6.25 %)               |
| Loss of appetite                                         | 4 (5.00 %)               |
| Meteorism                                                | 4 (5.0 %)                |
| Weakness                                                 | 3 (3.75 %)               |
| Flipping                                                 | 2 (2.50 %)               |
| New diabetes                                             | 2 (2.50 %)               |
| Constipation                                             | 2 (2.50 %)               |
| Fever                                                    | 1 (1.25 %)               |
| Cholangitis                                              | 1 (1.25 %)               |
| Duration of clinical symptoms [months]                   | 4.95 ± 3.90 (1-18)       |
| Duration of weight loss [months]                         | 4.02 ± 3.06 (0.5-12.00)  |
| BMI, body mass index; NRS , Nutritional Risk Score       |                          |

**Table S2.** The patients clinical characteristics regarding hospitalization and surgery.

| Feature                                          | Value               |
|--------------------------------------------------|---------------------|
| Total duration of hospitalization [days]         | 14.77 ± 8.90 (6-72) |
| Postoperative duration of hospitalization [days] | 12.97 ± 8.89 (5-71) |
| Hospitalization in ICU                           |                     |
| No                                               | 67 (83.75 %)        |

|                                               |                            |
|-----------------------------------------------|----------------------------|
| Yes                                           | 13 (16.25 %)               |
| Duration of hospitalization in ICU            | 4.50 ± 6.29 (1-22)         |
| General tumor location                        |                            |
| Proximal (head)                               | 58 (72.50 %)               |
| Distal (body, tail)                           | 22 (27.50 %)               |
| Detailed tumor location                       |                            |
| Head                                          | 58 (72.50 %)               |
| Body                                          | 9 (11.25 %)                |
| Tail                                          | 8 (10.00 %)                |
| Body and tail                                 | 5 (6.25 %)                 |
| Types of surgical resection                   |                            |
| Proximal (pancreaticoduodenectomy)            | 55 (68.75 %)               |
| Whipple                                       | 29 (36.25 %)               |
| Traverso                                      | 26 (32.50 %)               |
| Distal with splenectomy (RAMPS)               | 22 (27.50 %)               |
| Total pancreatectomy                          | 3 (3.75 %)                 |
| Duration of operation [min]                   | 449.79 ± 127.72 (185-704)  |
| ASA (points)                                  | 2.51 ± 0.53 (1-3)          |
| ASA classification                            |                            |
| 1                                             | 1 (1.25 %)                 |
| 2                                             | 37 (46.25 %)               |
| 3                                             | 42 (52.50 %)               |
| 4                                             | 0 (0.00 %)                 |
| 5                                             | 0 (0.00 %)                 |
| Blood loss [ml]                               | 528.22 ± 340.28 (100-1600) |
| Blood transfusion                             |                            |
| No                                            | 66 (82.50 %)               |
| Yes                                           | 14 (17.50 %)               |
| Postoperative morbidity                       | 18 (22.50 %)               |
| Postoperative mortality                       | 1 (1.25 %)                 |
| Reoperations                                  | 9 (11.25 %)                |
| Readmissions                                  | 5 (6.25 %)                 |
| Types of postoperative complications          |                            |
| POPF                                          | 4 (5.00 %)                 |
| B                                             | 2 (2.50 %)                 |
| C                                             | 2 (2.50 %)                 |
| Wound infection                               | 4 (5.00 %)                 |
| Wound dehiscence (eventration)                | 2 (2.50 %)                 |
| Intraabdominal hematoma                       | 3 (3.75 %)                 |
| Intraabdominal hemorrhage                     | 1 (1.25 %)                 |
| Intraabdominal collection / abscess           | 4 (5.00 %)                 |
| Perforation of transverse colon / peritonitis | 1 (1.25 %)                 |
| Sigmoid colon necrosis                        | 1 (1.25 %)                 |
| Acute pancreatitis                            | 2 (2.50 %)                 |
| DGE                                           | 2 (2.50 %)                 |
| Hydrothorax                                   | 6 (7.50 %)                 |
| Pneumonia                                     | 3 (3.75 %)                 |
| Pneumothorax                                  | 1 (1.25 %)                 |
| Covid-19 infection                            | 1 (1.25 %)                 |

Types of postoperative complications according to Clavien Dindo classification

|                                         |                       |
|-----------------------------------------|-----------------------|
| 0                                       |                       |
| 1                                       | 62 (77.50 %)          |
| 2                                       | 7 (8.75 %)            |
| 3                                       | 2 (2.50 %)            |
| 4                                       | 8 (10.00 %)           |
| 5                                       | 0 (0.00 %)            |
|                                         | 1 (1.25 %)            |
| Surgical margin status                  |                       |
| R0                                      | 44 (55.00 %)          |
| R1                                      | 17 (21.25 %)          |
| R1 direct                               | 16 (20.00 %)          |
| R2                                      | 3 (2.75 %)            |
| Neoadjuvant chemotherapy                |                       |
| No                                      | 68 (85.00 %)          |
| Yes                                     | 12 (15.00 %)          |
| Chemotherapy regimen                    |                       |
| Number of cycles                        | FOLFIRINOX 12 (100 %) |
| Neoadjuvant radiotherapy                |                       |
| No                                      | 79 (89.75 %)          |
| Yes                                     | 11 (1.25 %)           |
| Perioperative parenteral nutrition      |                       |
| No                                      | 66 (82.50 %)          |
| Yes                                     | 14 (17.50 %)          |
| Duration of parenteral nutrition [days] |                       |
| 10.07 ± 5.27 (1-22)                     |                       |

ICU, Intensive Care Unit; ASA, American Society of Anesthesiologists; R, resection margin type; POPF, postoperative pancreatic fistula; DGE, delayed gastric emptying.

Table S3. Laboratory results.

| Feature                                    | Value                          |
|--------------------------------------------|--------------------------------|
| Total protein [g/dl]                       | 6.10 ± 0.97 (3.90-7.40)        |
| Albumin [g/dl]                             | 3.50 ± 0.73 (2.0-4.7)          |
| White blood cell count [/mm <sup>3</sup> ] | 7.40 ± 2.17 (2.81-13.70)       |
| Neutrophil count [/mm <sup>3</sup> ]       | 4.46 ± 161 (0.62-8.18)         |
| Monocyte count [/mm <sup>3</sup> ]         | 0.62 ± 0.25 (0.19-1.52)        |
| Total lymphocyte count [/mm <sup>3</sup> ] | 1.93 ± 0.77 (0.61-4.24)        |
| Platelet count [/mm <sup>3</sup> ]         | 255.16 ± 102.83 (94.00-579.00) |
| Hemoglobin [g/dl]                          | 13.08 ± 1.53 (9.75-16.10)      |
| CRP [mg/l]                                 | 7.24 ± 10.60 (0.30-53.30)      |
| ALT [U/l]                                  | 36.29 ± 19.99 (9.50-88.00)     |
| AST [U/l]                                  | 40.14 ± 34.71 (17-200)         |
| GGT [U/l]                                  | 63.67 ± 48.69 (2.00-172.00)    |
| ALP [U/l]                                  | 119.93 ± 46.66 (49.00-220.00)  |
| Bilirubin [g/dl]                           | 1.13 ± 0.78 (0.36-3.91)        |
| Creatinine [g/dl]                          | 0.84 ± 0.17 (0.36-1.46)        |
| Amylase [U/l]                              | 53.31 ± 31.61 (13.00-147.00)   |
| Lipase [U/l]                               | 80.68 ± 92.03 (1.00-332.00)    |
| Cholesterol [mg/dl]                        | 169.68 ± 78.63 (34.00-371.00)  |
| Triglycerides [mg/dl]                      | 190.31 ± (66-514.00)           |
| Prothrombin time [s]                       | 12.22 ± 1.26 (9.80-17.60)      |
| Prothrombin activity [%]                   | 90.14 ± 13.82 (29.00-124.00)   |

|                     |                                |
|---------------------|--------------------------------|
| APTT [s]            | 30.72 ± 5.03 (19.10-47.20)     |
| INR                 | 1.08 ± 0.11 (0.87-1.54)        |
| CEA [ng/ml]         | 7.32 ± 10.33 (1.04-44.73)      |
| CA 19.9 [U/ml]      | 392.99 ± 566.00 (0.75-1926.26) |
| Fluid amylase [U/l] | 1862 ± 4323.03 (3-23871)       |
| PNI                 | 45.03 ± 8.42 (25.05-63.20)     |
| NLR                 | 2.92 ± 1.97 (0.25-11.12)       |
| MLR                 | 0.44 ± 0.45 (0.06-3.11)        |
| PLR                 | 156.81 ± 95.84 (41.67-500.00)  |

ALT; alanine aminotransferase; AST, aspartate aminotransferase; GGT; gamma-glutamyl transpeptidase; ALP, alkaline phosphatase; CRP, C-reactive protein; APTT; activated partial thromboplastin time; INR; international normalized ratio; CEA, carcinoembryonic antigen; CA 19.9, carbohydrate antigen; PNI, prognostic nutritional index; NLR, Neutrophil/lymphocyte ratio; MLR, Monocyte/lymphocyte ratio; PLR, Platelet/lymphocyte ratio.

**Table S4.** The tumor pathological characteristics.

| Feature                                   | Value                 |
|-------------------------------------------|-----------------------|
| Tumor diameter [cm]                       | 3.05 ± 1.01 (0.8-7.0) |
| Tumor depth (T) general division          |                       |
| T1-2                                      | 71 (88.75 %)          |
| T3                                        | 9 (11.25 %)           |
| Tumor depth (T) detailed division         |                       |
| T1                                        | 13 (16.25 %)          |
| T2                                        | 58 (72.50 %)          |
| T3                                        | 9 (11.25 %)           |
| Lymph node invasion (N) general division  |                       |
| N0                                        | 9 (11.25 %)           |
| N+                                        | 71 (88.75 %)          |
| Lymph node invasion (N) detailed division |                       |
| N0                                        | 9 (11.25 %)           |
| N1                                        | 22 (27.50 %)          |
| N2                                        | 49 (61.25 %)          |
| Distant metastasis                        |                       |
| M0                                        | 71 (88.75 %)          |
| M1                                        | 9 (11.25 %)           |
| Histological type                         |                       |
| Adenocarcinoma                            | 75 (93.75 %)          |
| Adenosquamous carcinoma                   | 5 (6.25 %)            |
| Histological grading general division     |                       |
| G1-2                                      | 58 (72.50 %)          |
| G3                                        | 22 (27.50 %)          |
| Histological grading detailed division    |                       |
| G1                                        | 8 (10.00 %)           |
| G2                                        | 50 (62.50 %)          |
| G3                                        | 22 (27.50 %)          |
| Microvascular invasion                    |                       |
| No                                        | 24 (30.00 %)          |
| Yes                                       | 56 (70.00 %)          |
| Perineural infiltration                   |                       |
| No                                        | 7 (8.75 %)            |
| Yes                                       | 73 (91.25 %)          |

|                                                    |              |
|----------------------------------------------------|--------------|
| Immunohistochemistry                               |              |
| AbPaS ( + )                                        | 40 (50.00 %) |
| p63 ( + )                                          | 12 (15.00 %) |
| Tumor regression score after neoadjuvant treatment |              |
| 1                                                  | 0 (0.00 %)   |
| 2                                                  | 7 (8.75 %)   |
| 3                                                  | 5 (6.25 %)   |
| Not applicable                                     | 68 (85.00 %) |
| Coexistent neoplasm                                |              |
| IPMN (Intraductal papillary mucinous neoplasm)     | 7 (8.75 %)   |
| MCN (Mucinous cystic neoplasm)                     | 1 (1.25 %)   |
| NET (Neuroendocrine tumor)                         | 1 (1.25 %)   |
| Absent                                             | 71 (88.75 %) |

**Table S5.** Comparison of selected clinicopathological and nutritional parameters depending on the tumor location.

| Feature                                     | Proximal location<br>(pancreatic head)<br>(n = 58)   | Distal location<br>(pancreatic body / tail) (n = 22) | p value |
|---------------------------------------------|------------------------------------------------------|------------------------------------------------------|---------|
| Age [years]                                 | 64.29 ± 7.95                                         | 68.45 ± 8.90                                         | 0.0465  |
| Gender                                      | 30 (51.72 %) Male<br>28 (48.28 %) Female             | 10 (45.45 %) Male<br>12 (54.55 %) Female             | 0.6165  |
| Tumor depth (T)                             | 10 (17.24 %) T1<br>45 (77.59 %) T2<br>3 (5.17 %) T3  | 3 (13.64 %) T1<br>13 (59.09 %) T2<br>6 (27.27 %) T3  | 0.0202  |
| Lymph node invasion (N)                     | 6 (10.34 %) N0<br>15 (25.86 %) N1<br>37 (63.79 %) N2 | 3 (13.64 %) N0<br>7 (31.83 %) N1<br>12 (54.55 %) N2  | 0.7475  |
| Distal metastasis (M)                       | 53 (92.98 %) M0<br>4 (7.02 %) M1                     | 18 (81.82 %) M0<br>4 (18.18 %) M1                    | 0.1404  |
| Histological type                           |                                                      |                                                      |         |
| 1. Adenocarcinoma                           | 56 (96.55 %)                                         | 19 (86.36 %)                                         | 0.0928  |
| 1. Adenosquamous carcinoma                  | 2 (3.45 %)                                           | 3 (13.64 %)                                          |         |
| Histological grading                        | 4 (6.90 %) G1<br>38 (65.52 %) G2<br>16 (27.59 %) G3  | 4 (18.18 %) G1<br>12 (54.55 %) G2<br>6 (27.27 %) G3  | 0.3105  |
| Weight [kg]                                 | 70.24 ± 12.51                                        | 72.70 ± 14.07                                        | 0.4498  |
| Weight loss [kg]                            | 9.37 ± 8.55                                          | 2.50 ± 4.88                                          | 0.0104  |
| Weight loss                                 |                                                      |                                                      |         |
| 1. Stable                                   | 31 (54.35 %)                                         | 18 (81.82 %)                                         | 0.0326  |
| 2. Weight loss ≤ 10 %                       | 9 (15.52 %)                                          | 3 (13.64 %)                                          |         |
| 3. Weight loss > 10 %                       | 18 (31.03 %)                                         | 1 (5.55 %)                                           |         |
| BMI groups according to WHO classification  |                                                      |                                                      |         |
| < 18.5                                      | 3 (5.17 %)                                           | 0 (0.00 %)                                           | 0.6730  |
| 18.5-24.9                                   | 24 (41.38 %)                                         | 9 (40.91 %)                                          |         |
| 25-29.9                                     | 28 (48.28 %)                                         | 11 (50.00 %)                                         |         |
| ≥ 30                                        | 3 (5.17 %)                                           | 2 (9.09 %)                                           |         |
| Duration of clinical manifestation [months] | 4.54 ± 3.79                                          | 7.37 ± 3.89                                          | 0.0482  |
| NRS 2002 classification                     |                                                      |                                                      |         |
| 1.                                          | 18 (31.03 %)                                         | 7 (31.82 %)                                          | 0.4852  |

|                                            |                                     |                                    |          |
|--------------------------------------------|-------------------------------------|------------------------------------|----------|
| 2.                                         | 22 (37.93 %)                        | 12 (54.55 %)                       |          |
| 3.                                         | 8 (13.79 %)                         | 2 (9.09 %)                         |          |
| 4.                                         | 6 (10.34 %)                         | 1 (4.55 %)                         |          |
| 5.                                         | 4 (6.90 %)                          | 0 (0.00 %)                         |          |
| Common clinical symptoms                   |                                     |                                    |          |
| Jaundice                                   | 42 (72.41 %)                        | 0 (0.00 %)                         | < 0.0001 |
| Diarrhea                                   | 12 (20.69 %)                        | 1 (4.55 %)                         | 0.0805   |
| Abdominal pain                             | 28 (48.28 %)                        | 9 (40.91 %)                        | 0.5551   |
| Neoadjuvant chemotherapy                   | 9 (15.52 %)                         | 3 (13.64 %)                        | 0.8334   |
| Count of chemotherapy cycles               | 6.44 ± 1.59                         | 8.33 ± 5.77                        | 0.7115   |
| Preoperative biliary stenting              | 11 (18.97 %) No<br>47 (87.03 %) Yes | 22 (100.00 %) No<br>0 (0.00 %) Yes | <0.0001  |
| Duration of hospitalization [days]         | 16.07 ± 9.55                        | 11.36 ± 5.84                       | 0.0002   |
| Postoperative morbidity rate               | 14 (25.93 %)                        | 4 (19.05 %)                        | 0.5311   |
| Postoperative mortality rate               | 1 (11.11 %)                         | 0 (0.00 %)                         | 0.3359   |
| Reoperation rate                           | 7 (12.07 %)                         | 2 (9.09 %)                         | 0.7067   |
| Readmission rate                           | 3 (5.26 %)                          | 2 (9.09 %)                         | 0.5311   |
| Duration of operation                      | 502.21 ± 94.67                      | 311.59 ± 97.19                     | <0.0001  |
| Blood loss [ml]                            | 524.42 ± 313.84                     | 536.84 ± 403.06                    | 0.8786   |
| ASA classification                         |                                     |                                    |          |
| 1.                                         | 1 (1.72 %)                          | 0 (0.00 %)                         | 0.6645   |
| 2.                                         | 28 (48.28 %)                        | 9 (40.91 %)                        |          |
| 3.                                         | 29 (50.00 %)                        | 13 (59.09 %)                       |          |
| Smoking                                    | 37 (63.79 %) No<br>21 (36.21 %) Yes | 11 (50.00 %) No<br>11 (50 %) Yes   | 0.2608   |
| Postoperative parenteral nutrition         | 45 (77.59 %) No<br>13 (22.41 %) Yes | 21 (95.45 %) No<br>1 (4.55 %) Yes  | 0.0373   |
| Duration of parenteral nutrition [days]    | 7.63 ± 6.52                         | 2.00 ± 3.46                        | 0.1653   |
| Total protein [g/dl]                       | 5.71 ± 1.15                         | 6.15 ± 0.98                        | 0.4833   |
| Albumin [g/dl]                             | 3.42 ± 0.73                         | 3.73 ± 0.70                        | 0.0677   |
| White blood cell count [/mm <sup>3</sup> ] | 7.78 ± 2.12                         | 6.41 ± 2.00                        | 0.0109   |
| Neutrophil count [/mm <sup>3</sup> ]       | 4.67 ± 1.47                         | 3.79 ± 1.88                        | 0.0865   |
| Monocyte count [/mm <sup>3</sup> ]         | 0.63 ± 0.67                         | 0.59 ± 0.19                        | 0.5366   |
| Total lymphocyte count [/mm <sup>3</sup> ] | 1.99 ± 0.85                         | 1.78 ± 0.49                        | 0.5055   |
| Platelet count [/mm <sup>3</sup> ]         | 270.00 ± 105.73                     | 216.71 ± 85.56                     | 0.0202   |
| Hemoglobin [g/dl]                          | 12.96 ± 1.50                        | 13.42 ± 1.59                       | 0.2326   |
| CRP [mg/l]                                 | 7.89 ± 10.38                        | 5.25 ± 11.41                       | 0.0397   |
| ALT [U/l]                                  | 41.56 ± 19.92                       | 23.35 ± 13.58                      | 0.0013   |
| AST [U/l]                                  | 44.92 ± 39.21                       | 26.69 ± 7.57                       | 0.0971   |
| GGT [U/l]                                  | 78.48 ± 47.03                       | 30.37 ± 35.55                      | 0.0008   |
| ALP [U/l]                                  | 136.41 ± 42.69                      | 74.62 ± 18.73                      | 0.0008   |
| Bilirubin [g/dl]                           | 1.30 ± 0.86                         | 0.70 ± 0.22                        | 0.0162   |
| Ca 19.9                                    | 286.15 ± 456.77                     | 927.22 ± 865.36                    | 0.0756   |
| CEA [ng/ml]                                | 4.80 ± 5.26                         | 20.76 ± 20.79                      | 0.0292   |
| PNI                                        | 44.38 ± 8.63                        | 46.90 ± 7.77                       | 0.3221   |
| NLR                                        | 2.74 ± 1.61                         | 2.21 ± 1.05                        | 0.4989   |
| MLR                                        | 0.36 ± 0.16                         | 0.37 ± 0.25                        | 0.5820   |
| PLR                                        | 158.78 ± 91.38                      | 151.16 ± 110.91                    | 0.5699   |

NRS 2002, Nutritional Risk Score; BMI, body mass index; ASA, American Society of Anesthesiologists; ALT; alanine aminotransferase; AST, aspartate aminotransferase; GGT; gamma-glutamyl transpeptidase; ALP, alkaline phosphatase; CRP, C-reactive protein; CEA, carcinoembryonic antigen; CA 19.9, carbohydrate antigen; PNI, prognostic nutritional index; NLR, Neutrophil/lymphocyte ratio; MLR, Monocyte/lymphocyte ratio; PLR, Platelet/lymphocyte ratio.

Significant results ( $p < 0.05$ ) are highlighted in red print.

**Table S6.** Comparison of selected clinicopathological and nutritional parameters depending on age.

| Feature                                   | Age $\leq 65$ years ( $n = 39$ )    | Age $> 65$ years ( $n = 41$ )       | $p$ value     |
|-------------------------------------------|-------------------------------------|-------------------------------------|---------------|
| NRS 2002                                  | $1.87 \pm 1.00$                     | $2.39 \pm 1.16$                     | <b>0.0326</b> |
| ASA                                       | $2.38 \pm 0.54$                     | $2.63 \pm 0.49$                     | <b>0.0335</b> |
| Weight [kg]                               | $76.24 \pm 11.47$                   | $65.86 \pm 12.27$                   | <b>0.0002</b> |
| Weight loss [kg]                          | $8.70 \pm 9.05$                     | $6.96 \pm 9.77$                     | 0.5922        |
| Total protein [g/dl]                      | $6.36 \pm 0.80$                     | $5.86 \pm 1.05$                     | 0.0447        |
| Albumin [g/dl]                            | $3.68 \pm 0.62$                     | $3.33 \pm 0.79$                     | 0.0468        |
| Total lymphocyte count [ $/\text{mm}^3$ ] | $1.98 \pm 0.82$                     | $1.90 \pm 0.75$                     | 0.8938        |
| Neutrophil count [ $/\text{mm}^3$ ]       | $4.75 \pm 1.55$                     | $4.23 \pm 1.64$                     | 0.2856        |
| Monocyte count [ $/\text{mm}^3$ ]         | $0.59 \pm 0.21$                     | $0.64 \pm 0.27$                     | 0.9878        |
| White blood cell count [ $/\text{mm}^3$ ] | $7.46 \pm 2.14$                     | $7.35 \pm 2.20$                     | 0.8228        |
| Platelet count [ $/\text{mm}^3$ ]         | $251.53 \pm 106.95$                 | $258.53 \pm 100.09$                 | 0.5462        |
| Hemoglobin [g/dl]                         | $13.41 \pm 1.54$                    | $12.78 \pm 1.47$                    | <b>0.0265</b> |
| CRP [mg/l]                                | $7.38 \pm 10.52$                    | $7.12 \pm 10.85$                    | 1.0000        |
| PNI                                       | $47.77 \pm 7.62$                    | $42.96 \pm 8.52$                    | <b>0.0300</b> |
| NLR                                       | $2.62 \pm 1.27$                     | $2.60 \pm 1.68$                     | 0.6785        |
| MLR                                       | $0.33 \pm 0.13$                     | $0.38 \pm 0.22$                     | 0.8016        |
| PLR                                       | $149.27 \pm 83.33$                  | $162.52 \pm 102.13$                 | 0.6153        |
| Postoperative parenteral nutrition        | 36 (92.31 %) No<br>3 (7.69 %) Yes   | 30 (73.17 %) No<br>11 (26.83 %) Yes | <b>0.0115</b> |
| Duration of parenteral nutrition [days]   | $3.28 \pm 5.00$                     | $10.45 \pm 5.82$                    | <b>0.0243</b> |
| Duration of hospitalization               | $12.87 \pm 4.37$                    | $16.58 \pm 11.47$                   | 0.2073        |
| Postoperative morbidity                   | 7 (18.92 %)                         | 11 (28.95 %)                        | 0.3076        |
| Postoperative mortality                   | 0 (0.00 %)                          | 1 (2.44 %)                          | 0.5125        |
| Reoperation rate                          | 2 (5.13 %)                          | 7 (17.07 %)                         | 0.0894        |
| Readmission rate                          | 1 (2.63 %)                          | 4 (9.76 %)                          | 0.2040        |
| Arterial hypertension                     | 20 (51.28 %) No<br>19 (48.72 %) Yes | 20 (48.78 %) No<br>21 (51.22 %) Yes | 0.8230        |
| Ischemic heart disease                    | 37 (94.87 %) No<br>2 (5.13 %) Yes   | 38 (92.68 %) No<br>3 (7.32 %) Yes   | 0.5240        |
| Diabetes mellitus (type 2)                | 27 (69.23 %) No<br>12 (30.77 %) Yes | 28 (68.29 %) No<br>13 (31.71 %) Yes | 0.9279        |

NRS 2002, Nutritional Risk Score; BMI, body mass index; ASA, American Society of Anesthesiologists; ICU, Intensive Care Unit; ALT; alanine aminotransferase; AST, aspartate aminotransferase; GGT; gamma-glutamyl transpeptidase; ALP, alkaline phosphatase; CRP, C-reactive protein; APTT; activated partial thromboplastin time; INR; international normalized ratio; CEA, carcinoembryonic antigen; CA 19.9, carbohydrate antigen; PNI, prognostic nutritional index; NLR, Neutrophil/lymphocyte ratio; MLR, Monocyte/lymphocyte ratio; PLR, Platelet/lymphocyte ratio.

Significant results ( $p < 0.05$ ) are highlighted in red print.

**Table S7.** Comparison of selected clinicopathological and nutritional parameters depending on the NRS 2002 classification.

| Feature | NRS 2002 $< 3$ ( $n = 59$ ) | NRS 2002 $\geq 3$ ( $n = 21$ ) | $p$ value |
|---------|-----------------------------|--------------------------------|-----------|
|---------|-----------------------------|--------------------------------|-----------|



|                            |                                                                                       |                                                                                     |          |
|----------------------------|---------------------------------------------------------------------------------------|-------------------------------------------------------------------------------------|----------|
| Age [years]                | 64.61 ± 8.71                                                                          | 67.76 ± 7.01                                                                        | 0.1396   |
| Age groups                 |                                                                                       |                                                                                     |          |
| ≤ 65 years                 | 33 (55.93 %)                                                                          | 6 (28.57 %)                                                                         | 0.0312   |
| > 65 years                 | 26 (44.07 %)                                                                          | 15 (71.43 %)                                                                        |          |
| Gender                     | 31 (52.54 %) Male<br>28 (47.46 %) Female                                              | 9 (42.85 %) Male<br>12 (57.14 %) Female                                             | 0.3060   |
| General tumor location     | 40 (67.80 %) Proximal<br>19 (32.20 %) Distal                                          | 18 (87.71 %) Proximal<br>3 (14.29 %) Distal                                         | 0.0946   |
| Detailed tumor location    | 40 (67.80 %) head<br>7 (11.86 %) body<br>7 (11.86 %) tail<br>5 (8.47 %) body and tail | 18 (85.71 %) head<br>2 (9.52 %) body<br>1 (4.76 %) tail<br>0 (0.00 %) body and tail | 0.1956   |
| Tumor depth (T)            | 7 (18.76 %) T1<br>46 (77.97 %) T2<br>6 (10.17 %) T3                                   | 6 (28.57 %) T1<br>12 (57.14 %) T2<br>3 (14.29 %) T3                                 | 0.1481   |
|                            | 26 (44.07 %) T1-2<br>33 (55.93 %) T3                                                  | 7 (33.33 %) T1-2<br>14 (66.67 %) T3                                                 | 0.2762   |
| Lymph node invasion (N)    | 6 (10.17 %) N0<br>17 (28.81 %) N1<br>36 (61.02 %) N2                                  | 3 (14.29 %) N0<br>5 (23.81 %) N1<br>13 (61.90 %) N2                                 | 0.8285   |
|                            | 6 (10.17 %) N0<br>53 (89.83 %) N +                                                    | 3 (14.29 %) N0<br>18 (85.71 %) N +                                                  | 0.4361   |
| Distal metastasis (M)      | 54 (93.10 %)<br>4 (6.90 %)                                                            | 17 (80.95 %)<br>4 (19.05 %)                                                         | 0.1138   |
| Histological type          |                                                                                       |                                                                                     |          |
| 2. Adenocarcinoma          | 55 (93.22 %)                                                                          | 20 (95.24 %)                                                                        | 0.6058   |
| 3. Adenosquamous carcinoma | 4 (6.78 %)                                                                            | 1 (4.76 %)                                                                          |          |
| Histological grading       | 8 (13.56 %) G1<br>35 (59.32 %) G2<br>16 (27.12 %) G3                                  | 0 (0.00 %) G1<br>15 (71.33 %) G2<br>6 (28.57 %) G3                                  | 0.0729   |
| Perineural invasion        | 53 (91.38 %)                                                                          | 19 (90.48 %)                                                                        | 0.9001   |
| Microvascular invasion     | 42 (71.19 %)                                                                          | 14 (66.67 %)                                                                        | 0.6980   |
| AbPas ( + )                | 26 (44.07 %)                                                                          | 14 (66.67 %)                                                                        | 0.0753   |
| Surgical margin status     | 35 (59.32 %) R0<br>12 (20.34 %) R1 direct<br>11 (18.64 %) R1<br>1 (1.69 %) R2         | 9 (42.86 %) R0<br>5 (23.81 %) R1 direct<br>5 (23.81 %) R1<br>2 (9.52 %) R2          | 0.3094   |
| Weight [kg]                | 73.12 ± 11.31                                                                         | 64.74 ± 12.82                                                                       | 0.0098   |
| Weight loss [kg]           | 4.93 ± 7.15                                                                           | 13.64 ± 7.69                                                                        | 0.0006   |
| Weight loss                |                                                                                       |                                                                                     |          |
| 1. Stable                  | 44 (75.58 %)                                                                          | 5 (23.81 %)                                                                         | < 0.0001 |

|                                             |                    |                                     |                                     |        |
|---------------------------------------------|--------------------|-------------------------------------|-------------------------------------|--------|
| 2.                                          | Weight loss ≤ 10 % | 8 (13.56 %)                         | 4 (19.05 %)                         |        |
| 3.                                          | Weight loss > 10 % | 7 (11.86 %)                         | 12 (57.14 %)                        |        |
| BMI groups                                  |                    |                                     |                                     |        |
| 1.                                          | < 18.5             | 1 (1.69 %)                          | 2 (9.52 %)                          | 0.1048 |
| 2.                                          | ≥ 18.5             | 58 (98.31 %)                        | 19 (90.48 %)                        |        |
| BMI groups                                  |                    |                                     |                                     |        |
| 1.                                          | < 30               | 54 (91.53 %)                        | 21 (100.00 %)                       | 0.1682 |
| 2.                                          | ≥ 30               | 5 (8.47 %)                          | 0 (0.00 %)                          |        |
| BMI groups according to WHO classification  |                    |                                     |                                     |        |
|                                             | < 18.5             | 3 (3.75 %)                          | 1 (1.69 %)                          | 0.1201 |
|                                             | 18.5-24.9          | 33 (41.25 %)                        | 11 (52.38 %)                        |        |
|                                             | 25-29.9            | 39 (48.75 %)                        | 8 (38.10 %)                         |        |
|                                             | ≥ 30               | 5 (6.25 %)                          | 0 (0.00 %)                          |        |
| BMI [kg/m²]                                 |                    | 25.53 ± 3.46                        | 23.66 ± 3.37                        | 0.0358 |
| Arterial hypertension                       |                    | 28 (47.46 %) No<br>31 (52.54 %) Yes | 12 (57.14 %) No<br>9 (42.86 %) Yes  | 0.3060 |
| Ischemic heart disease                      |                    | 54 (91.53 %) No<br>5 (8.47 %) Yes   | 21 (100 %) No<br>0 (0.00 %) Yes     | 0.1683 |
| Diabetes mellitus (type 2)                  |                    | 41 (69.49 %) No<br>18 (30.51 %) Yes | 14 (66.67 %) No<br>7 (33.33 %) Yes  | 0.5067 |
| Smoking                                     |                    | 37 (62.71 %) No<br>22 (37.29 %) Yes | 11 (52.38 %) No<br>10 (47.62 %) Yes | 0.2825 |
| Alcohol consumption                         |                    | 53 (89.83 %) No<br>6 (10.17 %) Yes  | 19 (90.48 %) No<br>2 (9.52 %) Yes   | 0.6500 |
| Duration of clinical manifestation [months] |                    | 4.55 ± 3.91                         | 5.78 ± 3.86                         | 0.2995 |
| Duration of weight loss [months]            |                    | 3.50 ± 3.12                         | 4.50 ± 3.03                         | 0.3014 |
| Common clinical symptoms                    |                    |                                     |                                     |        |
| Jaundice                                    |                    | 28 (47.00 %)                        | 14 (67.00 %)                        | 0.1035 |
| Diarrhea                                    |                    | 9 (15 %)                            | 4 (19.00 %)                         | 0.4609 |
| Abdominal pain                              |                    | 26 (44.00 %)                        | 11 (52 %)                           | 0.3434 |
| Neoadjuvant chemotherapy                    |                    | 5 (8.00 %)                          | 7 (33.00 %)                         | 0.0061 |
| Count of chemotherapy cycles                |                    | 6.00 ± 1.09                         | 8.20 ± 4.32                         | 0.2561 |
| Preoperative biliary stenting               |                    | 28 (47.46 %) No<br>31 (52.54 %) Yes | 5 (23.81 %) No<br>16 (76.19 %) Yes  | 0.0492 |
| Duration of hospitalization [days]          |                    | 13.89 ± 5.83                        | 17.24 ± 14.35                       | 0.6658 |
| Postoperative morbidity rate                |                    | 11 (20.00 %)                        | 7 (35.00 %)                         | 0.1495 |
| Postoperative mortality rate                |                    | 0 (0.00 %)                          | 1 (5.00 %)                          | 0.0980 |
| Reoperation rate                            |                    | 6 (10.00 %)                         | 3 (14.00 %)                         | 0.4361 |
| Readmission rate                            |                    | 4 (7.00 %)                          | 1 (5.00 %)                          | 0.6260 |
| Duration of operation                       |                    | 430.15 ± 125.47                     | 504.95 ± 120.20                     | 0.0201 |
| Blood loss [ml]                             |                    | 520.21 ± 301.92                     | 553.33 ± 451.77                     | 0.7799 |
| ASA classification                          |                    |                                     |                                     |        |
| 1.                                          |                    | 1 (2.0 %)                           | 0 (0.00 %)                          | 0.4514 |
| 2.                                          |                    | 25 (42.00 %)                        | 12 (57.00 %)                        |        |
| 3.                                          |                    | 33 (65 %)                           | 9 (43.00 %)                         |        |
| Smoking                                     |                    | 37 (62.71 %) No<br>22 (37.29 %) Yes | 11 (52.38 %) No<br>10 (47.62 %) Yes | 0.4066 |

|                                            |                                    |                                    |        |
|--------------------------------------------|------------------------------------|------------------------------------|--------|
| Postoperative parenteral nutrition         | 52 (88.14 %) No<br>7 (11.86 %) Yes | 14 (66.67 %) No<br>7 (33.33 %) Yes | 0.0262 |
| Duration of parenteral nutrition [days]    | 4.71 ± 5.59                        | 10.62 ± 6.41                       | 0.0349 |
| Total protein [g/dl]                       | 6.18 ± 1.07                        | 5.86 ± 1.33                        | 0.2248 |
| Albumin [g/dl]                             | 3.56 ± 6.80                        | 3.35 ± 8.77                        | 0.3478 |
| White blood cell count [/mm <sup>3</sup> ] | 7.23 ± 2.05                        | 7.88 ± 2.46                        | 0.2401 |
| Neutrophil count [/mm <sup>3</sup> ]       | 4.47 ± 1.78                        | 4.41 ± 0.93                        | 0.9025 |
| Monocyte count [/mm <sup>3</sup> ]         | 0.62 ± 0.22                        | 0.61 ± 0.33                        | 0.2690 |
| Total lymphocyte count [/mm <sup>3</sup> ] | 1.88 ± 0.62                        | 1.58 ± 0.90                        | 0.0292 |
| Platelet count [/mm <sup>3</sup> ]         | 254.18 ± 104.82                    | 257.86 ± 99.60                     | 0.8243 |
| Hemoglobin [g/dl]                          | 13.10 ± 1.53                       | 13.04 ± 1.55                       | 0.8693 |
| CRP [mg/l]                                 | 8.15 ± 11.92                       | 4.93 ± 5.79                        | 0.4262 |
| ALT [U/l]                                  | 33.95 ± 21.71                      | 37.35 ± 19.45                      | 0.6125 |
| AST [U/l]                                  | 41.00 ± 39.44                      | 38.59 ± 25.20                      | 0.9790 |
| GGT [U/l]                                  | 49.63 ± 46.37                      | 68.84 ± 49.70                      | 0.4019 |
| ALP [U/l]                                  | 113.85 ± 39.54                     | 132.10 ± 58.88                     | 0.3210 |
| Bilirubin [g/dl]                           | 1.14 ± 0.70                        | 1.10 ± 1.07                        | 0.5157 |
| Ca 19.9 [U/ml]                             | 227.65 ± 228.95                    | 652.82 ± 831.53                    | 0.5261 |
| CEA [ng/ml]                                | 3.87 ± 2.86                        | 14.79 ± 32.64                      | 0.0275 |
| PNI                                        | 46.03 ± 8.47                       | 41.91 ± 7.74                       | 0.1111 |
| NLR                                        | 2.45 ± 1.24                        | 3.11 ± 2.13                        | 0.1815 |
| MLR                                        | 0.35 ± 0.20                        | 0.38 ± 0.15                        | 0.2796 |
| PLR                                        | 154.76 ± 97.43                     | 163.53 ± 98.87                     | 0.7505 |

NRS 2002, Nutritional Risk Score; BMI, body mass index; ASA, American Society of Anesthesiologists; ICU, Intensive Care Unit; ALT; alanine aminotransferase; AST, aspartate aminotransferase; GGT; gamma-glutamyl transpeptidase; ALP, alkaline phosphatase; CRP, C-reactive protein; APTT; activated partial thromboplastin time; INR; international normalized ratio; CEA, carcinoembryonic antigen; CA 19.9, carbohydrate antigen; PNI, prognostic nutritional index; NLR, Neutrophil/lymphocyte ratio; MLR, Monocyte/lymphocyte ratio; PLR, Platelet/lymphocyte ratio.

Significant results ( $p < 0.05$ ) are highlighted in red print.

**Table S8.** Comparison of selected clinicopathological and nutritional parameters depending on PNI.

| Feature                                    | PNI < 45 ( $n = 43$ ) | PNI > 45 ( $n = 37$ ) | $p$ value |
|--------------------------------------------|-----------------------|-----------------------|-----------|
| Age [years]                                | 67.25 ± 8.92          | 64.48 ± 9.63          | 0.3215    |
| NRS 2002                                   | 2.41 ± 1.41           | 2.00 ± 1.00           | 0.4128    |
| ASA                                        | 2.62 ± 0.49           | 2.43 ± 0.51           | 0.2649    |
| Weight [kg]                                | 68.79 ± 13.74         | 73.00 ± 11.21         | 0.2709    |
| BMI [kg/m <sup>2</sup> ]                   | 24.83 ± 3.71          | 25.07 ± 3.01          | 0.8110    |
| Weight loss [kg]                           | 7.92 ± 8.87           | 10.36 ± 9.75          | 0.5052    |
| Duration of hospitalization                | 19.29 ± 13.34         | 14.05 ± 7.22          | 0.0741    |
| Total protein [g/dl]                       | 5.28 ± 0.98           | 6.65 ± 0.47           | <0.0001   |
| Albumin [g/dl]                             | 2.90 ± 0.60           | 4.01 ± 0.48           | <0.0001   |
| Total lymphocyte count [/mm <sup>3</sup> ] | 1.78 ± 0.78           | 2.04 ± 0.82           | 0.2914    |
| Neutrophil count [/mm <sup>3</sup> ]       | 4.72 ± 1.70           | 4.51 ± 1.97           | 0.7114    |
| Monocyte count [/mm <sup>3</sup> ]         | 0.67 ± 0.23           | 0.64 ± 0.28           | 0.5541    |
| White blood cell count [/mm <sup>3</sup> ] | 7.74 ± 1.82           | 7.48 ± 2.33           | 0.5618    |
| Platelet count [/mm <sup>3</sup> ]         | 279.87 ± 124.84       | 225.86 ± 82.87        | 0.0995    |
| Hemoglobin [g/dl]                          | 12.70 ± 1.58          | 13.33 ± 1.51          | 0.1778    |
| CRP                                        | 10.19 ± 14.57         | 5.96 ± 7.57           | 0.9249    |
| CA 19.9                                    | 621.35 ± 599.95       | 181.54 ± 163.36       | 0.0741    |

|     |                 |                |        |
|-----|-----------------|----------------|--------|
| CEA | 6.63 ± 9.85     | 4.07 ± 2.95    | 0.7983 |
| NLR | 2.96 ± 1.73     | 2.53 ± 1.56    | 0.4220 |
| MLR | 0.43 ± 0.23     | 0.33 ± 0.12    | 0.0670 |
| PLR | 187.13 ± 117.39 | 131.98 ± 81.56 | 0.0637 |

PNI, prognostic nutritional index; NRS 2002, Nutritional Risk Score; BMI, body mass index; ASA, American Society of Anesthesiologists; ALT; CEA, carcinoembryonic antigen; CA 19.9, carbohydrate antigen; PNI, prognostic nutritional index; NLR, Neutrophil/lymphocyte ratio; MLR, Monocyte/lymphocyte ratio; PLR, Platelet/lymphocyte ratio.

Significant results ( $p < 0.05$ ) are highlighted in red print.

**Table S9.** Comparison of selected clinicopathological and nutritional parameters depending on presence of postoperative complications.

| Feature                                                     | No complications                             | Complications                               | <i>p</i> value |
|-------------------------------------------------------------|----------------------------------------------|---------------------------------------------|----------------|
| Age                                                         | 64.91 ± 8.80                                 | 66.61 ± 7.49                                | 0.4627         |
| Gender                                                      | 29 (50.88 %) Male<br>28 (49.12 %) Female     | 8 (44.40 %) Male<br>10 (55.56 %) Female     | 0.6341         |
| Weight                                                      | 70.93 ± 12.68                                | 70.92 ± 12.28                               | 0.9970         |
| Weight loss                                                 | 7.32 ± 8.82                                  | 8.37 ± 6.54                                 | 0.4039         |
| BMI                                                         | 24.78 ± 3.44                                 | 25.72 ± 3.64                                | 0.3211         |
| BMI groups                                                  |                                              |                                             |                |
| < 18.5                                                      | 2 (3.51 %)                                   | 1 (5.56 %)                                  | 0.6993         |
| ≥ 18.5                                                      | 55 (96.49 %)                                 | 17 (94.44 %)                                |                |
| BMI groups                                                  |                                              |                                             |                |
| < 30                                                        | 55 (96.49 %)                                 | 15 (83.33 %)                                | 0.0511         |
| ≥ 30                                                        | 2 (3.51 %)                                   | 3 (16.67 %)                                 |                |
| BMI groups according to WHO classification                  |                                              |                                             |                |
| < 18.5                                                      |                                              |                                             | 0.4130         |
| 18.5-24.9                                                   | 2 (3.51 %)                                   | 1 (5.56 %)                                  |                |
| 25-29.9                                                     | 26 (45.61 %)                                 | 5 (27.78 %)                                 |                |
| ≥ 30                                                        | 27 (47.37 %)                                 | 10 (55.56 %)                                |                |
|                                                             | 2 (3.51 %)                                   | 2 (11.11 %)                                 |                |
| NRS 2002                                                    | 2.03 ± 0.94                                  | 2.50 ± 1.38                                 | 0.3032         |
| NRS 2002 groups                                             |                                              |                                             |                |
| 1. < 3                                                      | 44 (77.14 %)                                 | 11 (61.11 %)                                | 0.1786         |
| 2. ≥ 3                                                      | 13 (22.81 %)                                 | 7 (38.89 %)                                 |                |
| Tumor location                                              | 40 (70.18 %) Proximal<br>17 (29.82 %) Distal | 14 (77.78 %) Proximal<br>4 (22.22 %) Distal | 0.5311         |
| Duration of hospitalization [days]                          | 12.17 ± 3.56                                 | 22.94 ± 15.05                               | 0.0001         |
| Duration of hospitalization in ICU [days]                   | 1.33 ± 1.00                                  | 10.25 ± 8.09                                | 0.0087         |
| Duration of postoperative hospitalization (patients number) |                                              |                                             |                |
| < 10 days                                                   | 38 (61.29 %)                                 | 4 (22.22 %)                                 | 0.0036         |
| > 10 days                                                   | 24 (38.71 %)                                 | 14 (77.78 %)                                |                |
| Postoperative parenteral nutrition                          | 6 (10.53 %)                                  | 7 (38.89 %)                                 | 0.0056         |
| Duration of parenteral nutrition [days]                     | 2.64 ± 4.08                                  | 12.11 ± 5.01                                | 0.0012         |
| Neoadjuvant chemotherapy                                    |                                              |                                             |                |
| No                                                          | 54 (87.10 %)                                 | 14 (77.78 %)                                | 0.3297         |
| Yes                                                         | 8 (12.90%)                                   | 4 (22.22 %)                                 |                |
| Total protein [g/dl]                                        | 6.24 ± 0.94                                  | 5.75 ± 0.97                                 | 0.0181         |

|                                            |                |                 |        |
|--------------------------------------------|----------------|-----------------|--------|
| Albumin [g/dl]                             | 3.64 ± 0.68    | 3.26 ± 0.80     | 0.0673 |
| Hemoglobin [g/dl]                          | 13.12 ± 1.48   | 12.72 ± 1.57    | 0.3231 |
| CRP [mg/l]                                 | 6.81 ± 10.19   | 8.33 ± 12.22    | 0.0464 |
| White blood cell count [/mm <sup>3</sup> ] | 7.24 ± 2.16    | 7.70 ± 2.27     | 0.4950 |
| Total lymphocyte count [/mm <sup>3</sup> ] | 1.96 ± 0.68    | 1.86 ± 0.99     | 0.6807 |
| Neutrophil count [/mm <sup>3</sup> ]       | 4.47 ± 1.72    | 4.45 ± 1.50     | 0.8770 |
| Monocyte count [/mm <sup>3</sup> ]         | 0.59 ± 0.21    | 0.69 ± 0.35     | 0.5902 |
| Platelet count [/mm <sup>3</sup> ]         | 252.15 ± 92.54 | 259.58 ± 117.76 | 0.7546 |
| PNI                                        | 45.00 ± 8.03   | 42.12 ± 8.55    | 0.0552 |
| NLR                                        | 2.58 ± 1.50    | 2.75 ± 1.63     | 0.8651 |
| MLR                                        | 0.32 ± 0.11    | 0.46 ± 0.29     | 0.0725 |
| PLR                                        | 143.00 ± 75.91 | 193.43 ± 138.29 | 0.3955 |

NRS 2002, Nutritional Risk Score; BMI, body mass index; ASA, American Society of Anesthesiologists; CRP, C-reactive protein; PNI, prognostic nutritional index; NLR, Neutrophil/lymphocyte ratio; MLR, Monocyte/lymphocyte ratio; PLR, Platelet/lymphocyte ratio.

Significant results ( $p < 0.05$ ) are highlighted in red print.

**Table S10.** Comparison of the incidence of postoperative complications according to duration of postoperative hospitalization.

| Duration of postoperative hospitalization | < 10 days (n = 42) | > 10 days (n = 38) | p value |
|-------------------------------------------|--------------------|--------------------|---------|
| Complications                             |                    |                    |         |
| No                                        | 38 (90.48 %)       | 24 (63.16 %)       | 0.0035  |
| Yes                                       | 4 (9.52 %)         | 14 (36.84 %)       |         |

Significant results ( $p < 0.05$ ) are highlighted in red print.

**Table S11.** Comparison of selected clinicopathological, immune and nutritional parameters depending on the use of neoadjuvant chemotherapy.

| Feature         | No neoadjuvant chemotherapy (n = 68)         | Neoadjuvant chemotherapy (n = 12)         | p value   |
|-----------------|----------------------------------------------|-------------------------------------------|-----------|
| Age             | 65.28 ± 8.60                                 | 66.33 ± 7.25                              | 0.6904    |
| Gender          | 34 (50.00 %) Male<br>34 (50.00 %) Female     | 6 (50.00 %) Male<br>6 (50.00 %) Female    | 1.0000    |
| Weight          | 71.02 ± 12.88                                | 70.33 ± 13.69                             | 0.8660    |
| Weight loss     | 7.03 ± 8.22                                  | 11.57 ± 8.44                              | 0.1901    |
| BMI             | 25.16 ± 3.53                                 | 24.37 ± 3.44                              | 0.4762    |
| BMI groups      |                                              |                                           | 0.0000001 |
| < 18.5          | 3 (4.41 %)                                   | 12 (100.00 %)                             |           |
| ≥ 18.5          | 65 (95.59 %)                                 | 0 (0.00 %)                                |           |
| BMI groups      |                                              |                                           | 0.3320    |
| < 30            | 63 (92.65 %)                                 | 12 (100.00 %)                             |           |
| ≥ 30            | 5 (7.35 %)                                   | 0 (0.00 %)                                |           |
| NRS 2002        | 2.03 ± 1.10 (1-5)                            | 2.75 ± 0.96 (1-4)                         | 0.0375    |
| NRS 2002 groups |                                              |                                           | 0.0061    |
| 1. < 3          | 54 (79.41 %)                                 | 5 (41.67 %)                               |           |
| 2. ≥ 3          | 14 (20.59 %)                                 | 7 (58.33 %)                               |           |
| Tumor location  | 49 (72.06 %) Proximal<br>19 (27.94 %) Distal | 9 (75.00%) Proximal<br>3 (25.00 %) Distal | 0.8334    |
| Tumor depth (T) | 9 (13.24 %) T1<br>51 (75.00 %) T2            | 4 (33.33 %) T1<br>7 (58.33 %) T2          | 0.2195    |

|                                                                       |                    |                   |               |
|-----------------------------------------------------------------------|--------------------|-------------------|---------------|
|                                                                       | 8 (11.76 %) T3     | 1 (8.33 %) T3     |               |
|                                                                       | 28 (41.18 %) T1-2  | 5 (41.67 %) T1-2  | 0.9746        |
|                                                                       | 40 (58.82 %) T3    | 7 (58.33 %) T3    |               |
| Lymph node invasion (N)                                               | 9 (13.24 %) N0     | 0 (0.00 %) N0     | 0.4004        |
|                                                                       | 18 (26.47 %) N1    | 4 (33.33 %) N1    |               |
|                                                                       | 41 (60.29 %) N2    | 8 (66.67 %) N2    |               |
|                                                                       |                    | 9 (13.24 %) N0    | 0 (0.00 %) N0 |
|                                                                       | 59 (86.76 %) N+    | 12 (100.00 %) N+  |               |
| Distal metastasis (M)                                                 | 62 (91.18 %)       | 10 (83.33 %)      | 0.4037        |
|                                                                       | 6 (8.82 %)         | 2 (16.67 %)       |               |
| Histological type                                                     |                    |                   |               |
| Adenocarcinoma                                                        | 63 (92.65 %)       | 12 (100.00 %)     | 0.3320        |
| Adenosquamous carcinoma                                               | 5 (7.35 %)         | 0 (0.00 %)        |               |
| Histological grading                                                  | 7 (10.29 %) G1     | 0 (8.33 %) G1     | 0.9462        |
|                                                                       | 42 (61.76 %) G2    | 15 (66.67 %) G2   |               |
|                                                                       | 19 (27.94 %) G3    | 6 (25.00 %) G3    |               |
|                                                                       |                    |                   |               |
| Duration of postoperative hospitalization [days]                      |                    |                   |               |
| < 10                                                                  | 34 (50.00 %)       | 8 (66.67 %)       | 0.2865        |
| > 10                                                                  | 34 (50.00 %)       | 4 (33.33 %)       |               |
| Duration of hospitalization in ICU [days]                             | 4 ± 6.23 (0-22)    | 2 ± 0.00 (2-2)    | 0.7624        |
| Postoperative parenteral nutrition                                    | 12 (17.65 %)       | 2 (16.67 %)       | 0.9343        |
| Duration of parenteral nutrition [days]                               | 6.45 ± 5.59 (0-15) | 11 ± 15.56 (0-22) | 0.3537        |
| Postoperative complication rate                                       | 14 (20.59 %)       | 4 (33.33 %)       | 0.3297        |
| Postoperative complications according to Clavien Dindo classification |                    |                   |               |
| 0                                                                     |                    |                   |               |
| 1                                                                     | 53 (77.94 %)       | 9 (75.00 %)       | 0.3387        |
| 2                                                                     | 5 (7.35 %)         | 2 (16.67 %)       |               |
| 3                                                                     | 1 (1.47 %)         | 1 (8.33 %)        |               |
| 4                                                                     | 8 (11.76 %)        | 0 (0.00 %)        |               |
| 5                                                                     | 0 (0.00 %)         | 0 (0.00 %)        |               |
|                                                                       | 1 (1.47 %)         | 0 (0.00 %)        |               |
| Reoperation rate                                                      | 8 (11.76 %)        | 1 (8.33 %)        | 0.7287        |
| Mortality rate                                                        | 1 (1.47 %)         | 0 (0.00 %)        | 0.6725        |
| Total protein [g/dl]                                                  | 6.04 ± 0.97        | 6.44 ± 0.89       | 0.1933        |
| Albumin [g/dl]                                                        | 3.48 ± 0.74        | 3.64 ± 0.71       | 0.4875        |
| Hemoglobin [g/dl]                                                     | 13.15 ± 1.54       | 12.71 ± 1.46      | 0.3565        |
| CRP [mg/l]                                                            | 7.71 ± 11.37       | 4.58 ± 3.48       | 0.4195        |
| White blood cell count [/mm <sup>3</sup> ]                            | 7.25 ± 1.99        | 8.23 ± 2.95       | 0.1490        |
| Total lymphocyte count [/mm <sup>3</sup> ]                            | 1.91 ± 0.77        | 2.15 ± 0.81       | 0.4440        |
| Neutrophil count [/mm <sup>3</sup> ]                                  | 4.42 ± 1.60        | 4.70 ± 1.77       | 0.6668        |
| Monocyte count [/mm <sup>3</sup> ]                                    | 0.60 ± 0.22        | 0.76 ± 0.38       | 0.1128        |
| Platelet count [/mm <sup>3</sup> ]                                    | 262.71 ± 107.39    | 213.00 ± 59.15    | 0.1238        |
| PNI                                                                   | 44.78 ± 8.43       | 46.87 ± 8.76      | 0.5426        |
| NLR                                                                   | 2.56 ± 1.36        | 2.89 ± 2.30       | 0.5970        |
| MLR                                                                   | 0.36 ± 0.19        | 0.38 ± 0.16       | 0.7976        |

---

|     |                |                |        |
|-----|----------------|----------------|--------|
| PLR | 160.28 ± 96.13 | 131.54 ± 96.94 | 0.4619 |
|-----|----------------|----------------|--------|

---

NRS 2002, Nutritional Risk Score; BMI, body mass index; ASA, American Society of Anesthesiologists; CRP, C-reactive protein; PNI, prognostic nutritional index; NLR, Neutrophil/lymphocyte ratio; MLR, Monocyte/lymphocyte ratio; PLR, Platelet/lymphocyte ratio.

Significant results ( $p < 0.05$ ) are highlighted in red print.

---
